# Supplementary material
Source: PubMed Central journal article supplement (PMC11250777)
Supplement: NIHMS2006329-supplement-1.pdf [file NIHMS2006329-supplement-1.pdf]

## **Supplemental Data**

### **RGS2 regulates urotensin II-induced intracellular Ca<sup>2+</sup> elevation and contraction in glomerular mesangial cells**

---

Adebowale Adebisi

Department of Physiology

University of Tennessee Health Science Center, Memphis TN, USA

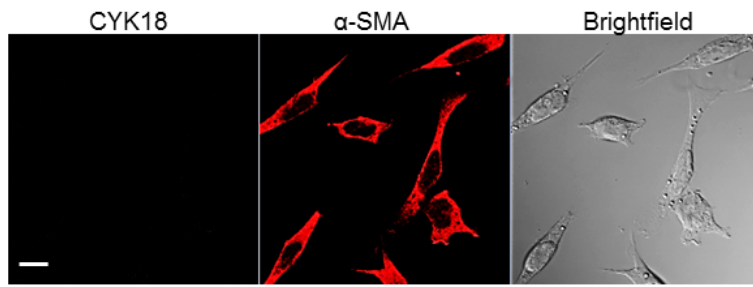

**Figure 1:** Characterization of cultured murine GMCs. Immunofluorescence staining of mouse GMCs demonstrating negative and positive staining for CYK18 and  $\alpha$ -SMA, respectively. Bar = 10  $\mu$ m.

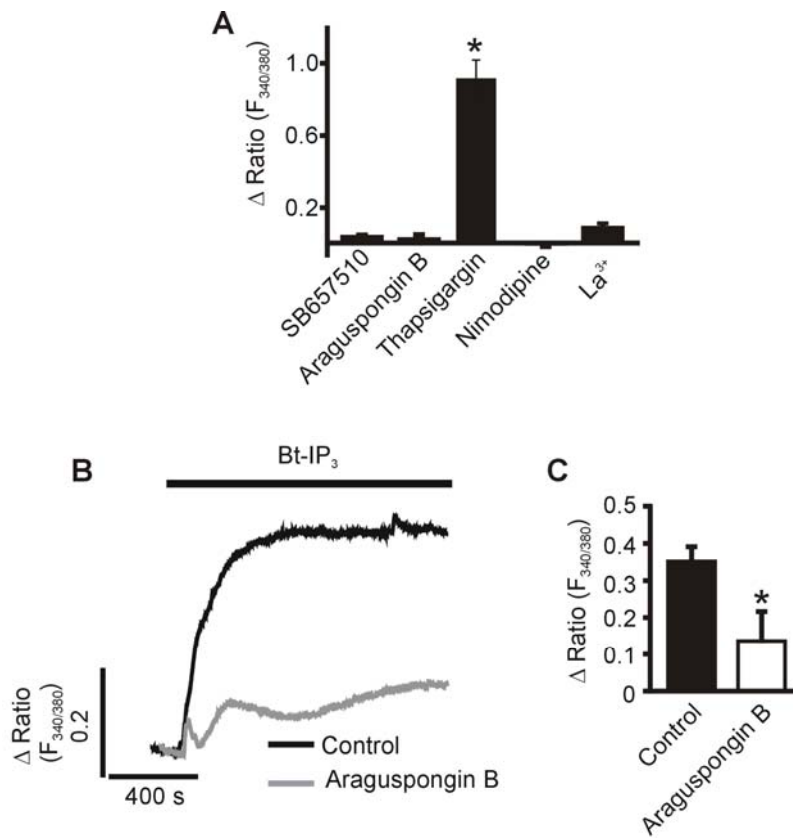

**Figure 2:** **A**, Mean data showing the effects of SB657510 (5  $\mu$ M; n = 7), araguspongin B (3  $\mu$ M; n = 6), thapsigargin (100 nM; n = 10), nimodipine (1  $\mu$ M; n = 5), and La<sup>3+</sup> (50  $\mu$ M; n = 5) on basal Fura-2 ratio in murine GMCs. **B**, Exemplar trace and **C**, Mean data demonstrating that araguspongin B inhibits Bt-IP<sub>3</sub> (10  $\mu$ M)-induced [Ca<sup>2+</sup>]<sub>i</sub> elevation in murine GMCs (Control, n = 4; Bt-IP<sub>3</sub>, n = 5). \**P*<0.05.

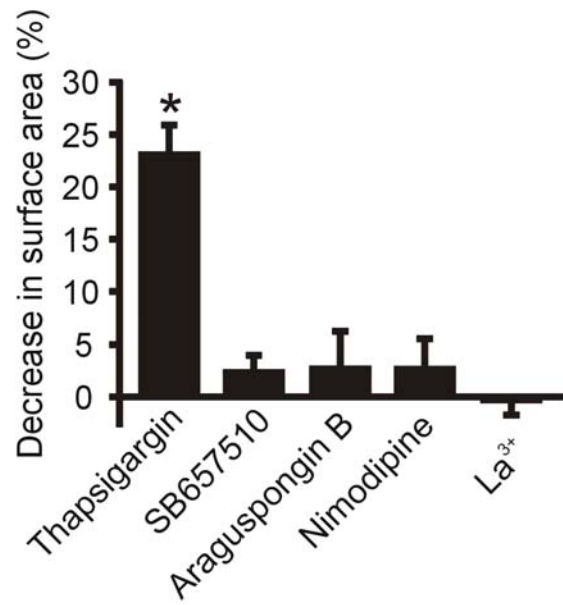

**Figure 3:** Mean data showing the effects of thapsigargin (100 nM; n = 7), SB657510 (5  $\mu$ M; n = 10), araguspongin B (3  $\mu$ M; n = 10), nimodipine (1  $\mu$ M; n = 6), and La<sup>3+</sup> (50  $\mu$ M; n = 10) on original murine GMC planar surface area. \* $P$ <0.05.
